# Supplementary material for: Ambient Air Quality and Emergency Hospital Admissions in Singapore: A Time-Series Analysis
Source: MDPI journal article supplement (doi:10.3390/ijerph192013336), 2022-10-16

## SUPPLEMENTARY INFORMATION

Table S1. Primary ED diagnosis in ICD-9 and ICD-10 codes used to categorize cardiovascular and respiratory diseases.

|                         | ICD-9                | ICD-10                         |
|-------------------------|----------------------|--------------------------------|
| Cardiovascular diseases | 390–429, 439–59, 785 | I00–I59, I70–I99, R00–R01, R03 |
| Respiratory diseases    | 460–519, 786         | J00–J99, R04–09                |

Table S2. Pearson correlation coefficient matrix between six air pollutants

|                   | PM <sub>2.5</sub> | PM <sub>10</sub> | O <sub>3</sub> | NO <sub>2</sub> | SO <sub>2</sub> | CO       |
|-------------------|-------------------|------------------|----------------|-----------------|-----------------|----------|
| PM <sub>2.5</sub> |                   | 0.986287         | 0.305388       | 0.292939        | 0.189899        | 0.78873  |
| PM <sub>10</sub>  |                   |                  | 0.352508       | 0.260234        | 0.139743        | 0.784293 |
| O <sub>3</sub>    |                   |                  |                | -0.16511        | -0.15479        | 0.095209 |
| NO <sub>2</sub>   |                   |                  |                |                 | 0.579546        | 0.4533   |
| SO <sub>2</sub>   |                   |                  |                |                 |                 | 0.133367 |
| CO                |                   |                  |                |                 |                 |          |

Figure S1. Association between daily average air pollutant levels and cumulative relative risk (lag 0-7 days) of emergency admissions with sensitivity analysis by varying the degrees of freedom. The solid red line represents the modelled cumulative risk. The shaded areas represent the 95% confidence intervals. The black solid horizontal line represents the reference value. The blue dashed vertical line indicates the air pollutant level recommended by WHO air quality guidelines.

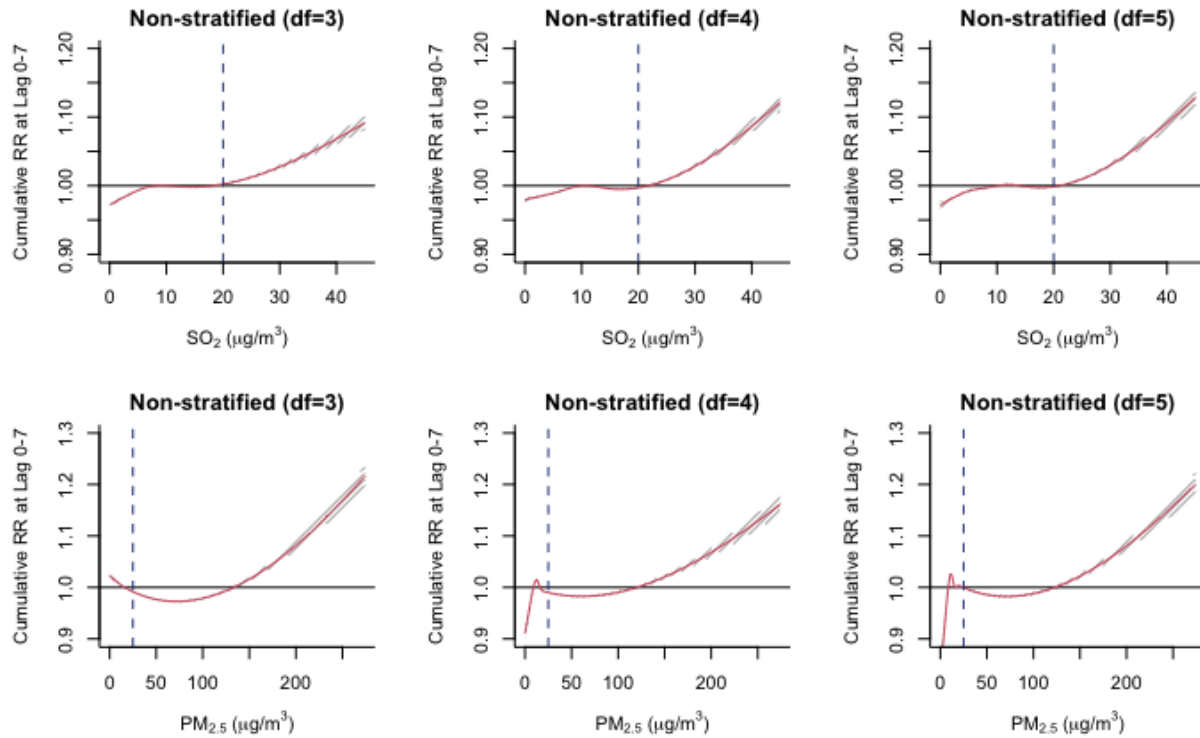

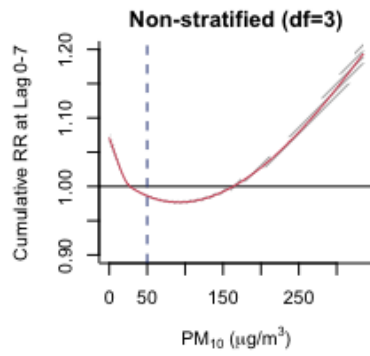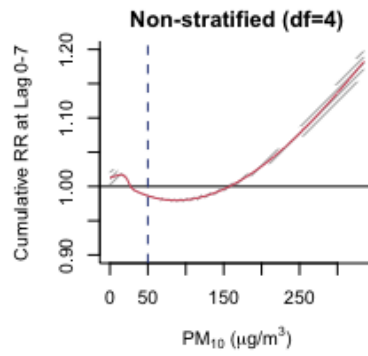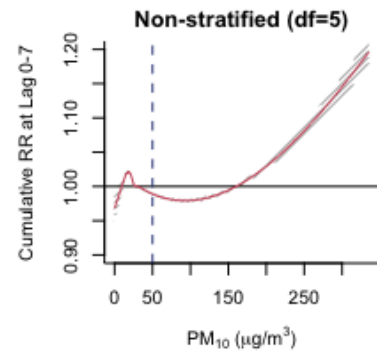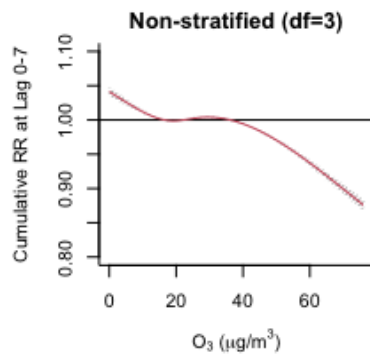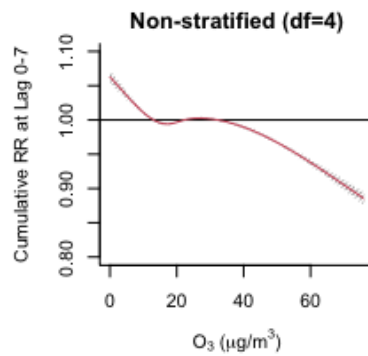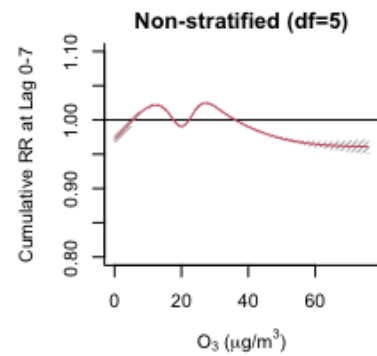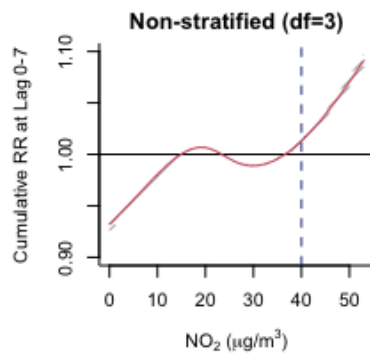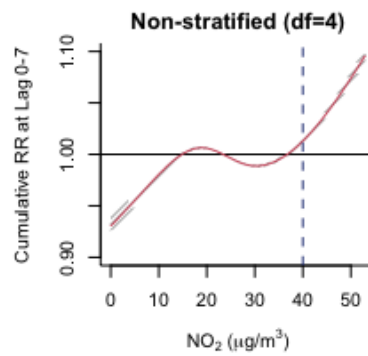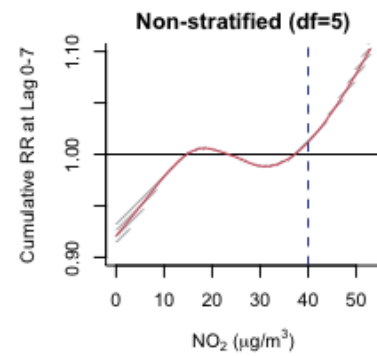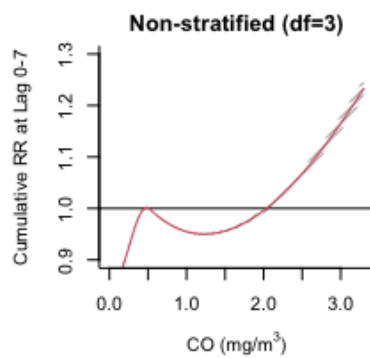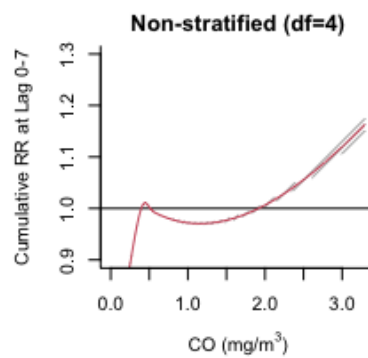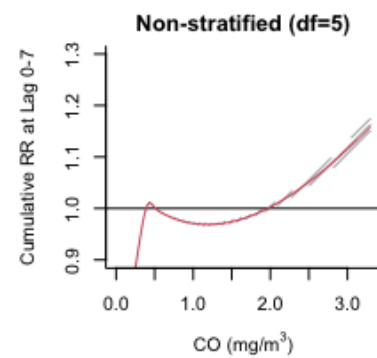

Figure S2. Plot of fitted and actual daily emergency admission counts, using multipollutant model with PM<sub>2.5</sub>

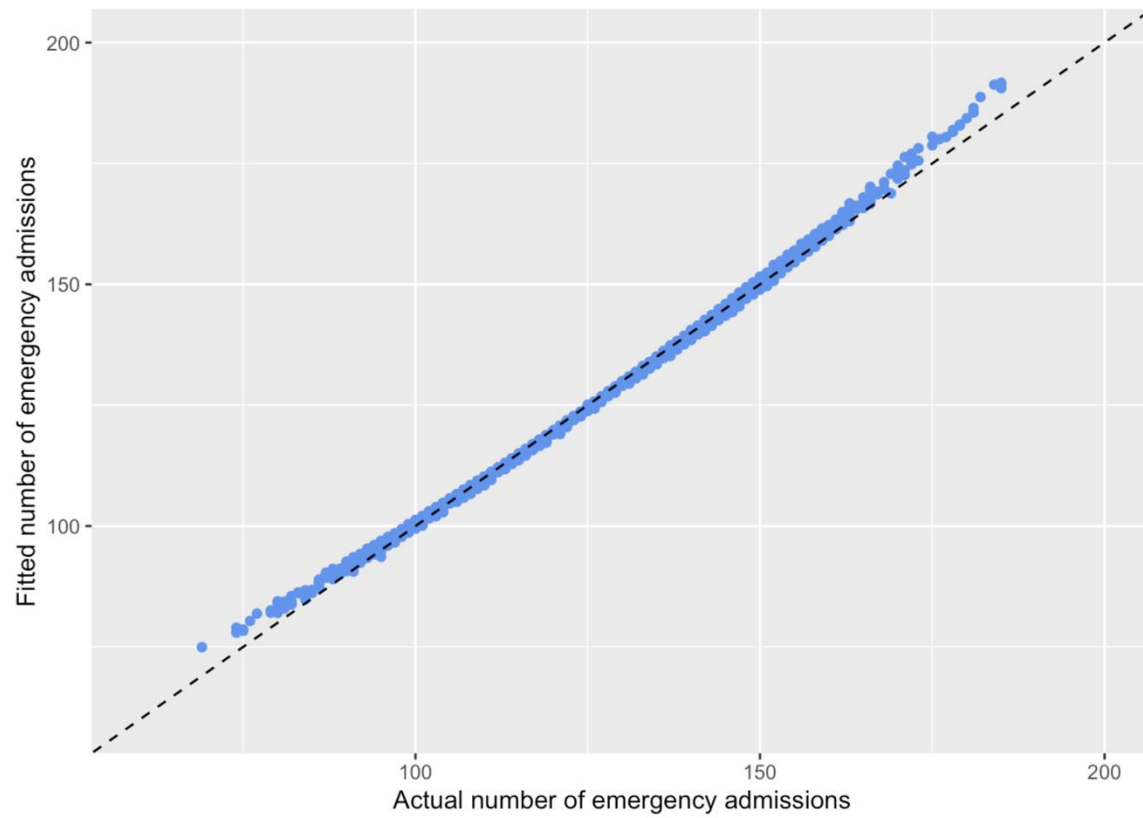

Figure S3. Association between daily average NO<sub>2</sub> and O<sub>3</sub> levels and cumulative relative risk (lag 0-7 days) of emergency admissions with sensitivity analysis by multipollutant models. The solid red line represents the modelled cumulative risk. The shaded areas represent the 95% confidence intervals. The black solid horizontal line represents the reference value. The blue dashed vertical line indicates the air pollutant level recommended by WHO air quality guidelines.

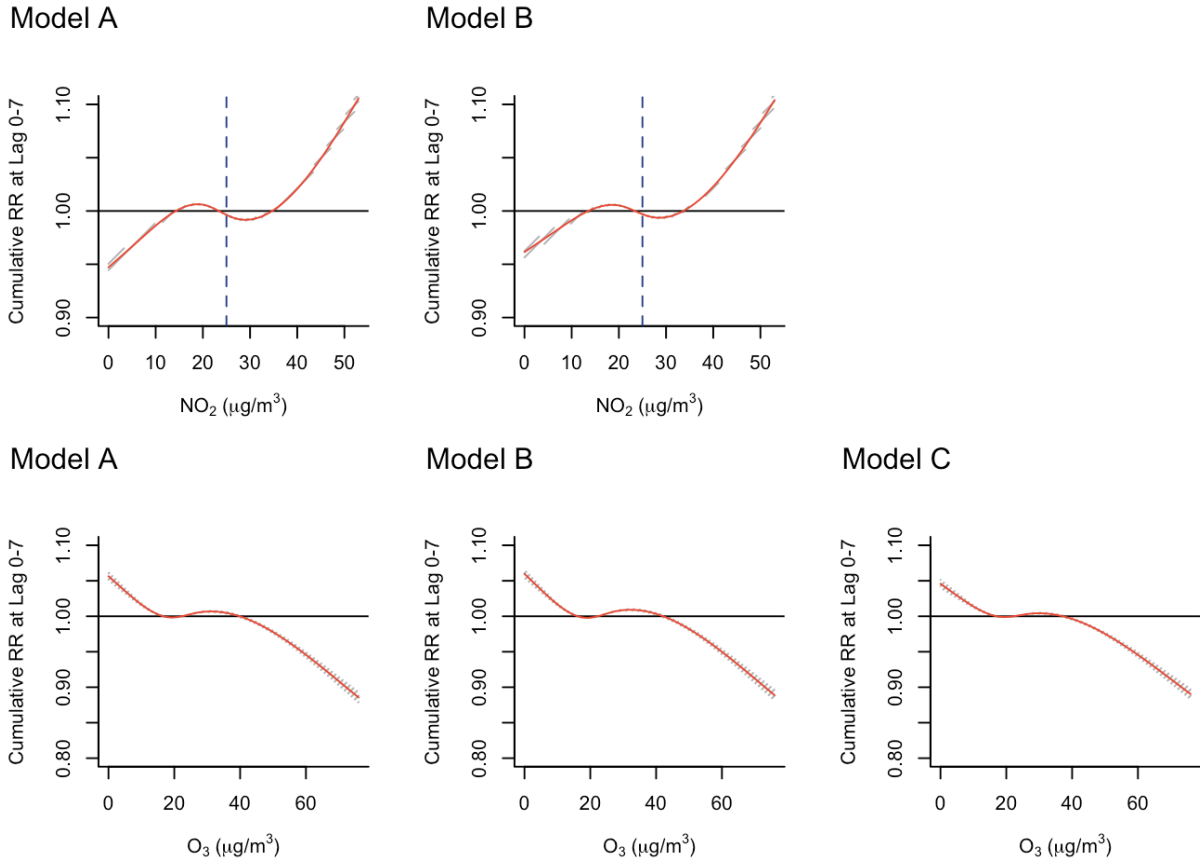

Supplement: s1 [file s1]
